1 **Title:**

2 **Population genomics unravels the Holocene history of *Triticum-Aegilops* species**

3

4 **Authors**

5 Xuebo Zhao<sup>1,2,#</sup>, Yafei Guo<sup>1,2,#</sup>, Lipeng Kang<sup>1,2</sup>, Aoyue Bi<sup>1,2</sup>, Daxing Xu<sup>1,2</sup>, Zhiliang Zhang<sup>1,2</sup>,

6 Jijin Zhang<sup>1,2</sup>, Xiaohan Yang<sup>1,2</sup>, Jun Xu<sup>1,2</sup>, Song Xu<sup>1,2</sup>, Xinyue Song<sup>1,3</sup>, Ming Zhang<sup>1,2</sup>,

7 Yiwen Li<sup>1</sup>, Philip Kear<sup>4</sup>, Jing Wang<sup>1</sup>, Changbin Yin<sup>1</sup>, Zhiyong Liu<sup>1,2</sup>, Xiangdong Fu<sup>1,2</sup>, Fei

8 Lu<sup>1,2,5,\*</sup>

9

10 **Affiliations**

11 <sup>1</sup>State Key Laboratory of Plant Cell and Chromosome Engineering, Institute of Genetics and  
12 Developmental Biology, Innovative Academy of Seed Design, Chinese Academy of  
13 Sciences, Beijing, China.

14 <sup>2</sup>University of Chinese Academy of Sciences, Beijing, China.

15 <sup>3</sup>State Key Laboratory of Conservation and Utilization of Bio-Resources in Yunnan and  
16 Center for Life Sciences, School of Life Sciences, Yunnan University, Kunming, China

17 <sup>4</sup>International Potato Center-China

18 <sup>5</sup>CAS-JIC Centre of Excellence for Plant and Microbial Science (CEPAMS), Institute of  
19 Genetics and Developmental Biology, Chinese Academy of Sciences, Beijing, China.

20 <sup>#</sup>These authors contributed equally to this work.

21 <sup>\*</sup>Corresponding author: [flu@genetics.ac.cn](mailto:flu@genetics.ac.cn) (F.L.)

## 22 **Abstract**

23 Deep knowledge of crop biodiversity is essential to improve global food security. Despite  
24 bread wheat serving as a keystone crop worldwide, the population history of bread wheat and  
25 its wild relatives (a.k.a. wheats) remains elusive. By analyzing whole-genome sequences of  
26 795 wheats, we found that bread wheat originated southwest of the Caspian Sea ~11,700  
27 years ago and underwent a slow speciation process, lasting ~3,300 years due to persistent  
28 gene flow from wild relatives. Soon after, bread wheat spread across Eurasia and reached  
29 Europe, South Asia, and East Asia ~7,000 to ~5,000 years ago, shaping a diversified but  
30 occasionally convergent adaptive landscape of bread wheat in novel environments. Opposite  
31 to cultivated wheat, wild wheat populations have declined by ~82% in the past ~2,000 years  
32 due to the food choice shift of humans, and likely continue to drop because of the changing  
33 climate. These findings will guide future efforts in protecting and utilizing wheat biodiversity  
34 to improve global food security.

## 35 **Introduction**

36 Climate change and the growing population are putting global food security at risk—the  
37 world crop production is projected to be inadequate by 2050<sup>1</sup>. While various adaptive  
38 strategies<sup>2</sup> and technologies<sup>3</sup> of plant breeding have been proposed to address the challenge,  
39 many of these opportunities lie in crop biodiversity, which preserves tremendous pre-adapted  
40 and beneficial alleles to develop productive, nutritious, stress-resilient, and sustainable crop  
41 varieties<sup>4</sup>. An in-depth understanding of cultivated crops and their wild relatives is central to  
42 integrating genetic resources and breeding methods effectively.

43

44 Bread wheat (*Triticum aestivum* ssp. *aestivum*,  $2n = 6x = 42$ , AABBDD) is one of the  
45 world's most important crops, providing ~20% calories and protein for the human diet<sup>5</sup>.  
46 Meanwhile, bread wheat and its relatives, such as domesticated einkorn (*T. monococcum* ssp.  
47 *monococcum*, AA) and domesticated emmer (*T. turgidum* ssp. *dicoccum*, AABB), were  
48 among the first crops bringing forth agriculture and subsequent civilization<sup>6</sup>. Due to the  
49 economic and cultural importance of these ancient crops, the evolutionary history of *Triticum*  
50 and *Aegilops* species, the two clades giving rise to modern bread wheat through  
51 polyploidization<sup>7</sup>, has been of great interest to both scientists<sup>7-9</sup> and the public<sup>10,11</sup>. Fueled by  
52 the landmark bread wheat reference genome<sup>12</sup>, recent studies have reconstructed the  
53 phylogeny of *Triticum-Aegilops* species<sup>13,14</sup>, characterized the population structure of  
54 modern wheat<sup>9,13,15-17</sup>, and identified historical gene flow from wild populations to bread  
55 wheat<sup>13,14,16,18,19</sup>. However, the population history of wheats (bread wheat and its wild  
56 relatives, or *Triticum-Aegilops* species) is largely incomplete, particularly the spatiotemporal  
57 dynamics of bread wheat emergence and dispersal, together with the genetic and ecological  
58 interaction between bread wheat and its wild relatives, remain elusive<sup>6,20,21</sup>.

59

60 Here we performed a genus-level sampling of *Triticum-Aegilops* species and conducted  
61 whole-genome sequence analyses to disentangle the deep past of wheats since the rise of  
62 agriculture ~10,000 years ago. The paralleled reconstruction of demographic histories of both  
63 cultivated and wild wheats provided the first example of the Holocene evolution of the entire  
64 gene pool appertaining to a crop species, insights from which will benefit biodiversity  
65 conservation and breeding of many crops.

66

## 67 **Results**

### 68 **Genomic data of *Triticum-Aegilops* populations**

69 We collected whole-genome sequencing data of 795 accessions, including 745 accessions  
70 from publicly available data set<sup>13,17,18</sup>, and 50 newly sequenced accessions in this study to  
71 complete the sampling of wild relatives of bread wheat. These highly diverse accessions are  
72 from 6 species and 25 subspecies in the genera *Triticum* and *Aegilops* (Fig. 1), representing  
73 a wide range of geographic distribution (73 countries, Supplementary Fig. 1), comprehensive  
74 ploidy levels (diploid, tetraploid, and hexaploid) and genome types (AA, BB/SS, AABB,  
75 AABBDD, and DD) related to the A, B, and D subgenomes of bread wheat, as well as distinct  
76 breeding status (wild progenitors, early domesticates, landraces, and cultivars)  
77 (Supplementary Table 1 and 2; for convenience, the common names of subspecies are used  
78 in this study). Notably, the collection also well represents the evolutionary trajectory of  
79 modern bread wheat<sup>7,8,14</sup> (Fig. 1c).

80

81 These high-coverage genomes (~6.5×) empowered high-quality calling of genetic  
82 variations in self-pollinated plants such as wheats (Supplementary Table 3). By applying the  
83 cross-ploidy variation discovery pipeline (Supplementary Fig. 2)<sup>13</sup>, we identified ~78 million  
84 single nucleotide polymorphisms (SNPs), and constructed version 1.1 of the whole-genome

85 genetic variation map of wheat (VMap 1.1) (Supplementary Note 1, and Supplementary Fig.  
86 3, and Supplementary Table 4 and 5). The false-positive error rate of variant calling, i.e., the  
87 proportion of segregating sites in the reference accession, Chinese Spring, was only 0.011%,  
88 which is similar to the error rates of high-quality SNPs in previous studies<sup>13,22</sup>.

89

## 90 **Spatiotemporal origin of bread wheat**

91 Many crops transitioned from weedy grasses to cultivated plants through solely domestication<sup>23</sup>.  
92 However, for bread wheat, this early transition was coupled with an additional polyploid  
93 speciation event, from which bread wheat arose through the hybridization between tetraploid  
94 wheats (AABB) and strangulata (*Ae. tauschii* ssp. *strangulata*, DD)<sup>24,25</sup>. Phylogenetic  
95 analyses of VMap 1.1 corroborated two recent findings regarding the origin of bread wheat  
96 (Fig. 1b,c, and Supplementary Note 2)<sup>13</sup>. One is the two-stage model of wheat domestication  
97 that wild emmer (*T. turgidum* ssp. *dicoccoides*, AABB) was transformed to domesticated  
98 emmer first, then free-threshing tetraploids. The other is the identification of free-threshing  
99 tetraploid wheats as the direct donor of the AB subgenomes during the polyploid speciation  
100 of bread wheat. Although the evolutionary topology of wheat populations becomes  
101 increasingly clear, there is limited consensus on the spatiotemporal dynamics of the  
102 emergence of bread wheat<sup>24</sup>.

103

104 As the progenitor of domesticated emmer, wild emmer comprises two subpopulations  
105 mostly confined to the northern and southern Levant in West Asia (Fig. 2a)<sup>26,27</sup>.  
106 Archaeological records from early Neolithic sites showed that domesticated emmer appeared  
107 in the northern Levant (Abu Hureyra and Cafer Höyük) and southern Levant (Tell Aswad)  
108 almost simultaneously ~9,800-9600 BP<sup>28</sup>, raising a controversial question in which place  
109 emmer wheat was first domesticated<sup>24</sup>. By reconstructing the phylogeny of AB lineage using

110 150,000 random SNPs, we found that wild emmer in the northern Levant was clustered with  
111 domesticated emmer (Fig. 1b). Moreover, bread wheat showed a closer identity by state (IBS)  
112 distance with northern wild emmer rather than southern wild emmer (Fig. 2a, and  
113 Supplementary Table 13 and 14). These results support the hypothesis that emmer wheat was  
114 domesticated around the Karacadag region in the northern Levant<sup>18,26</sup>.

115

116 The birthplace of bread wheat is also mysterious. As the distribution of wild emmer  
117 and strangulata is primarily restricted to the Levant and the south of the Caspian Sea,  
118 respectively, it was puzzling how the polyploid speciation of bread wheat could occur given  
119 the geographic isolation of parental taxa<sup>24</sup>. Here we identified that free-threshing tetraploids  
120 rather than wild emmer were the donor of the AB subgenomes of bread wheat (Fig. 1b and  
121 c)<sup>13</sup>, suggesting the scenario that hexaploidization of bread wheat did not occur until free-  
122 threshing tetraploids expanded to the south of the Caspian Sea<sup>24</sup>. Further analyses of IBS  
123 distance showed that strangulata accessions in the southwest of the Caspian Sea have the  
124 greatest affinity to bread wheat (Fig. 2a, and Supplementary Table 15), indicating that bread  
125 wheat came into being at the southwest coast of the Caspian Sea<sup>25</sup>.

126

127 To provide a temporal context of wheat speciation, we used SMC++<sup>29</sup>, which combines  
128 the simplicity of sequentially Markovian coalescent and the scalability of site frequency  
129 spectrum (SFS) based approaches, to infer divergence time between wheat populations.  
130 Given the distinct evolutionary trajectories of the AB and D subgenomes of bread wheat (Fig.  
131 1c), we inferred population split times of the AB and D lineages independently based on ~68  
132 million neutral SNPs in VMap 1.1 (Supplementary Note 3). The results from the AB lineage  
133 showed that domesticated emmer diverged from wild emmer 10,041±160 BP, free-threshing  
134 tetraploids separated from domesticated emmer 9,269±98 BP, and bread wheat split from

135 free-threshing tetraploids  $8,441 \pm 140$  BP (Fig. 2b). The temporal sequence coincides nicely  
136 with the oldest archaeological remains of domesticated emmer<sup>6,28</sup>, free-threshing  
137 tetraploids<sup>30</sup>, and bread wheat<sup>24</sup>. Considering that hexaploidization of bread wheat involves  
138 free-threshing tetraploids and strangulata simultaneously (Fig. 1c), the speciation times of  
139 bread wheat inferred from the AB and D lineages should concur. However, we observed a  
140 drastic gap of  $\sim 3,300$  years between the two estimates, in which bread wheat diverged from  
141 strangulata  $11,738 \pm 112$  BP (Fig. 2b).

142

143       Recent studies have identified an asymmetric wild-progenitor introgression in bread  
144 wheat, where introgression is much more prevalent in the AB subgenomes (19.43%) than in  
145 the D subgenome (0.49%)<sup>13</sup>. Given that gene flow can change the tempo of population  
146 differentiation<sup>31,32</sup>, the asymmetric introgression is likely to explain the different speciation  
147 times of bread wheat inferred from AB and D subgenomes. To provide a nuanced view of  
148 bread wheat speciation in the context of progenitor introgression, we investigated the  
149 chronology of gene flow between wheat populations through contrasting alternative  
150 demographic models<sup>33</sup> (Fig. 2c, and Supplementary Note 4). By comparing the observed joint  
151 SFS of bread wheat and its progenitor population to the expected under a specific model, we  
152 found archaic gene flow from wild emmer and domesticated emmer into bread wheat before  
153  $8,919$  BP (95% confidence interval (CI)  $8,316$ - $9,521$  BP) and  $7,228$  BP (95% CI  $6,760$ - $7,695$   
154 BP), respectively. Moreover, the best-fitting model predicted enduring and bidirectional gene  
155 flow between free-threshing tetraploids and bread wheat since the emergence of bread wheat  
156  $\sim 11,700$  BP. In contrast, the introgression from strangulata to the D subgenome of bread  
157 wheat was more ancient, predating  $9,729$  BP (95% CI  $9,015$ - $10,442$  BP). These results  
158 suggest that the long-standing and massive gene flow to the AB subgenomes resulted in slow  
159 speciation of nascent bread wheat, lasting  $\sim 3,300$  years until the distinct genetic makeup of

160 bread wheat was established. Notably, the near-complete reproductive isolation and  
161 concomitant clean-split between bread wheat and strangulata allow the estimate of the upper  
162 time-bound of population differentiation between cultivated crops and wild relatives, which  
163 is generally intractable in diploid crops.

164

### 165 **Trans-Eurasian dispersal of bread wheat**

166 The spread of bread wheat across Eurasia profoundly transformed human societies<sup>10</sup>. To  
167 elucidate the range expansion process, we selected 225 bread wheat landraces (hereinafter  
168 referred to as landraces) from VMap 1.1 based on the accessibility of geographic information  
169 to characterize the spatiotemporal dispersal of bread wheat ([Supplementary Table 18](#)).  
170 Model-based clustering of landraces exhibited a salient east-west axis of range expansion of  
171 bread wheat originating from West Asia ([Fig. 3a](#), and [Supplementary Fig. 18](#)), echoed by the  
172 Asian and European clades in the phylogeny of bread wheat ([Fig. 1b](#)). To reconstruct the  
173 bidirectional migration routes precisely, we applied the Estimated Effective Migration  
174 Surfaces (EEMS) method<sup>34</sup> to identify spatial barriers and corridors of bread wheat expansion  
175 ([Fig. 3a](#), and [Supplementary Fig. 19](#)). EEMS presented a fast migration route westward along  
176 the northern Mediterranean coast, consistent with the uniform ancestry of landraces in the  
177 area. In contrast, EEMS eastward migration patterns identified a massive roadblock at the  
178 Pamir Mountains that splits the Inner Asian landraces into Central and South Asian  
179 populations, suggesting the further spread of bread wheat eastward through the north and  
180 south routes of the Pamir Mountains.

181

182 Landraces in East and South Asia exhibited a complex population structure, illustrating  
183 a convoluted population history of Asian bread wheat as suggested by recent archeological  
184 studies<sup>35–39</sup>. To disentangle the dispersal of bread wheat in the vast land of geographic and



185 cultural diversity, especially how bread wheat spread into China, we used qpGraph<sup>40</sup> to  
186 explore the relationships between local landrace populations defined by EEMS (Fig. 3b and  
187 Supplementary Table 19). By testing 61,214 candidate admixture graph models, the best-  
188 fitting graph (Z-score = -2.76) predicted three dispersal routes connecting Central and East  
189 Asia, coinciding with the postulated Southern Himalaya route<sup>38</sup>, Hexi Corridor route<sup>37-39</sup>,  
190 and Steppe route<sup>35,36</sup>, respectively. The Southern Himalaya route is from Pakistan, through  
191 India, Myanmar, and Yunnan Province, into China. The mixed ancestry of landraces in  
192 southwest China (R9) provided the first evidence demonstrating the existence of the southern  
193 route<sup>38</sup>. The Hexi Corridor route can also be referred to as “proto-silk Road,” starting from  
194 Central Asia, through the Inner Asian Mountain Corridor and Hexi Corridor to inner China.  
195 This route is the most prominent hypothesis describing wheat spread in China, verified by its  
196 abundant archaeological sites<sup>37-39</sup>. The Steppe route was recently proposed because the wheat  
197 remains excavated from the lower Yellow River region (~4,250 BP) are earlier than those  
198 from the upper region (~3,850 BP), indicating an alternative northern route to China via the  
199 Mongolian Steppe other than the Hexi Corridor<sup>35</sup>. Despite the lack of wheat samples from  
200 southern Mongolia, our results support this newly hypothesized route with genetic  
201 evidence—two populations in the lower Yellow River region (R4) and East China (R5)  
202 descended from past hybridization events (Fig. 3b), with one of the parental populations  
203 likely to be the lineage that traveled across the Mongolian Steppe. The introduction of wheat  
204 to China through the Mongolian Steppe may be related to early agropastoral societies, e.g.,  
205 the Afanasievo people around the Altai Mountains, moving southward in response to the  
206 abrupt global cooling during the mid-Holocene<sup>36</sup>.

207

208 We used SMC++<sup>29</sup> to calculate splitting times between locally adapted and West Asia  
209 populations to infer the timing of bread wheat dispersal across Eurasia. Given that recent

210 crop exchange and accompanying gene flow may reduce the divergence time estimates, we  
211 first assessed the temporal pattern of gene flow between individual local populations using  
212 *fastsimcoal2*<sup>33</sup>. The results showed that populations in the Iberian Peninsula, Indus Valley,  
213 Yunnan Province, and East China exhibited early gene flow to the West Asia population  
214 (Supplementary Fig. 20 and Supplementary Table 20), and thus were qualified to calculate  
215 splitting times (Fig. 3c). As these four populations probably are not strictly locally confined,  
216 we inferred the timing of bread wheat dispersal at the continental level that bread wheat may  
217 have dispersed to Europe, South Asia, and East Asia ~7,000 BP, ~6,000 BP, and ~5,400 BP,  
218 which are concordant with archeological records<sup>35,37,38</sup>.

219

## 220 **New *Triticum* subspecies arising from bread wheat dispersal**

221 It becomes increasingly evident that interspecific hybridization is common during range  
222 expansion of species<sup>31</sup>. Bread wheat dispersal appeared to be no exception—we found  
223 several newly formed *Triticum* subspecies having their origins in sympatric hybridization  
224 between expanding bread wheat and locally preexisting tetraploid wheats. The phylogeny of  
225 *Triticum* populations showed that three hexaploid subspecies (AABBDD), including spelt (*T.*  
226 *aestivum* ssp. *spelta*), Macha (*T. aestivum* ssp. *macha*), and Xinjiang wheat (*T. aestivum* ssp.  
227 *petropavlovskiyi*), were clustered into the tetraploid clade; similarly, a tetraploid subspecies  
228 (AABB), Persian wheat (*T. turgidum* ssp. *carthlicum*), was within the hexaploid clade (Fig.  
229 1c and Supplementary Fig. 10). To clarify the ancestry of these outliers, we used phyloNet<sup>41</sup>  
230 to infer reticulate phylogenetic networks of these subspecies based on phylogenies of 9,612  
231 orthologous genes. The result showed a mixed ancestry of the four subspecies descending  
232 from hybrids between tetraploid wheats and bread wheat, with the genetic contribution of  
233 bread wheat from 33% to 54% (Fig. 3d and Supplementary Fig. 21). It is worth noting that  
234 spelt was considered the progenitor of bread wheat because it has a primitive phenotype of

235 hulled seed<sup>42</sup>, our result indicates that the phenotype is inherited from its tetraploid parent,  
236 domesticated emmer, and thus disproves the once-popular theory concerning the origin of  
237 bread wheat.

238

239 We then estimated the speciation time of the four subspecies using SMC++. To  
240 eliminate the noise from homoploid gene flow, we calculate the population splitting time  
241 between the hybrid offspring and only one of the parental taxa with different ploidy levels.  
242 The results showed spelt, Macha, Xinjiang wheat, and Persian wheat arose ~6,400 BP, 7,300  
243 BP, ~3,300 BP, and ~6,000 BP, respectively (Fig. 3a and Supplementary Fig. 22). By  
244 calculating the IBS distance between the four subspecies and individual accessions of their  
245 parental populations, we showed that these newly formed *Triticum* subspecies likely  
246 originate from Europe, West Asia, and Central Asia (Fig. 3a and Supplementary Fig. 23-26).

247

#### 248 **Genetic heritage of bread wheat expansion**

249 The trans-Eurasian dispersal of bread wheat may have involved extensive adaptive changes  
250 in the genome while colonizing novel environments. To investigate how the adaptation  
251 process affects the genetic diversity of bread wheat, we examined the correlations between  
252 SNPs and environmental variables of 225 landraces using redundancy analysis (RDA)<sup>43</sup>  
253 (Supplementary Table 22). These environmental variables include altitude and 19 bioclimatic  
254 variables related to either temperature or precipitation. We found that these variables  
255 explained 13.44% of the total SNP variance. To evaluate the confounding effect of  
256 environmental adaptation and isolation-by-distance, we performed a similar RDA analysis  
257 using latitude and longitude, instead, as explanatory variables, finding that only 6.05% SNP  
258 variance was explained (Supplementary Fig. 27). The results demonstrate the importance of  
259 environmental factors in shaping the adaptive genetic diversity of bread wheat. By

260 conducting individual RDA analyses on environmental variable categories, temperature-  
261 related variables (adjust  $r^2 = 0.11$ ) exhibited larger SNP variance than did precipitation  
262 (adjust  $r^2 = 0.075$ ) and altitude (adjust  $r^2 = 0.013$ ) (Fig. 4a). However, in search for the most  
263 important environmental variables, precipitation of the warmest quarter appeared on the top  
264 of the list (Fig. 4b), suggesting the complexity of local adaptation of bread wheat. To  
265 investigate the regional heterogeneity of adaptation, we performed RDA analyses on  
266 environmental variable categories using landraces from West Asia (WA), Europe (EU), Inner  
267 Asia (IA), East Asia (EA) and Southern Himalaya (SH) (Supplementary Fig. 28). The result  
268 showed that environment variables in WA explain the least SNP variance compared with  
269 other regions. In addition, the relative proportions of SNP variance explained by temperature,  
270 precipitation, and altitude varied in the five regions (Fig. 4c, Supplementary Fig. 29 and  
271 Supplementary Table 23). The results indicate that the accumulation of adaptive alleles from  
272 the range expansion has shaped a diverse adaptation landscape of bread wheat.

273

274 To identify genomic regions associated with adaptation, we performed cross-  
275 population composite likelihood ratio (XP-CLR)<sup>44</sup> analyses to detect selective sweeps  
276 between paired populations from the five populations mentioned above. Collectively,  
277 185,865 selective sweeps were discovered under the top 5% XP-CLR score threshold. As  
278 these sweeps may stem from selections of human preference, farming practices, etc., we then  
279 conducted environmental association analyses using Bayenv<sup>45</sup> to narrow down the candidate  
280 sweep regions to those related to environmental factors. Based on associations between 20  
281 environmental variables and allele frequency of 1.5M SNPs in 13 populations  
282 (Supplementary Fig. 30-32 and Supplementary Table 24), the analysis identified 269,279  
283 adaptation-associated SNPs (top 5% Bayes factor) intersecting with selective sweeps from  
284 XP-CLR, with an average of 2.15-fold enrichment for coexisting with sweep regions

285 (Supplementary Fig. 33 and Supplementary Table 25). A total of 19,999 genes were  
286 identified as being involved in the environmental adaptation of bread wheat, including 123  
287 cloned genes that regulate critical agronomic traits, such as disease resistance and abiotic  
288 stress response, etc. (Supplementary Fig. 34, and Supplementary Table 26-28), indicating the  
289 value of adaptation-associated genes in improving agronomic traits of modern wheat.

290

### 291 **Convergent adaptation of bread wheat to early flowering across Eurasia**

292 To further characterize these adaptation-associated genes, we focused on genes relevant to  
293 flowering time because flowering time is agriculturally important for crops and commonly  
294 deemed the most critical trait determining plant adaptation<sup>46</sup>. Remarkably, we found that the  
295 gene *Ppd-D1* exhibited convergent adaptation to early flowering and best showcased local  
296 adaptation of bread wheat. *Ppd-D1* on chromosome 2D is the primary determinant of  
297 photoperiod response in bread wheat. Dysfunctional *Ppd-D1* exhibits photoperiod  
298 insensitivity and early flowering phenotypes, which is crucial to the adaptation of bread  
299 wheat to global environments<sup>47</sup>. A total of three loss-of-function alleles of *Ppd-D1* have been  
300 identified so far in wheat populations (Fig. 4d), two of which are causal genetic variants,  
301 including a ~2kb deletion at upstream, and a 5-bp deletion in gene exons<sup>47,48</sup>. The XP-CLR  
302 analysis between IA and SH populations identified selective footprints on *Ppd-D1*, predicting  
303 an increased frequency of causative alleles of *Ppd-D1* in the SH population (Fig. 4e).  
304 However, the two causative alleles did not exist in SH landraces (Fig. 4f and Supplementary  
305 Fig. 35). Instead, we found a novel stop-gain mutation of *Ppd-D1* in the SH landraces,  
306 particularly enriched in the population from the Tibetan Plateau (Fig. 4f and g). We  
307 speculated that the stop-gain allele helped adapt bread wheat to the short growing season in  
308 high-altitude and low-temperature areas (>3,000 m). To test the hypothesis, we divided the  
309 SH landraces into high-altitude and low-altitude subpopulations and performed XP-CLR

310 analysis (Supplementary Table 29). The result showed that the XP-CLR score (99.75%  
311 quantile) on *Ppd-D1* became more significant when compared with the score (97.61%  
312 quantile) between IA and SH landraces, indicating *Ppd-D1* is involved in high-altitude  
313 adaptation (Fig. 4e and Supplementary Fig. 36). Furthermore, we found a strong correlation  
314 between the allele frequency of the stop-gain mutation and the average altitude of  
315 subpopulations from SH landraces ( $r^2 = 0.778$ , Fig. 4h), showing the causal effect of the stop-  
316 gain mutation in the high-altitude adaptation of bread wheat. Taken together, the three  
317 causative alleles of *Ppd-D1* complement each other in geographic distribution, with the stop-  
318 gain mutation in South Asia, the ~2kb deletion in East Asia, and the 5-bp deletion in Europe  
319 (Fig. 4g, i, and j), illustrating a highly diverse but convergent adaptation of bread wheat  
320 across Eurasia through its changing flowering time.

321

## 322 **Population size fluctuation of wheats**

323 Compared with cultivars, crop wild relatives has received relatively little attention from the  
324 evolutionary perspective<sup>4</sup>. To decipher the population dynamics of wild wheats, we  
325 reconstructed the history of effective population size ( $N_e$ ) of *Triticum-Aegilops* species using  
326 SMC++<sup>29</sup>. We found that  $N_e$  of *Aegilops* subspecies, including *strangulata*, *tauschii* (*Ae.*  
327 *tauschii* ssp. *tauschii*, DD), and speltoilds (*Ae. speltoides*, BB/SS), appeared to decline  
328 constantly in the last 100 thousand years (Supplementary Fig. 37). In contrast, all the  
329 *Triticum* species experienced a marked population size expansion during the Holocene. For  
330 bread wheat and early domesticates, such as domesticated einkorn, domesticated emmer, and  
331 free-threshing tetraploids, the population growth may reflect the cultivation history of these  
332 populations<sup>6</sup>; whereas for wild wheats that had never been domesticated, such as wild einkorn  
333 (*T. monococcum* ssp. *aegilopoides*, AA), urartu (*T. urartu*, AA), and wild emmer (Fig. 1 and  
334 Supplementary Fig. 37, 38), such population growth may result from their mixed growing

335 with early domesticates for thousands of years<sup>24,49</sup>. Strikingly, we found a ubiquitous  
336 population contraction right after the population growth for all the *Triticum* populations  
337 except for modern cultivars of bread wheat. The population decline occurred sequentially  
338 with ploidy levels—the diploids came first, then the tetraploids, and lastly, the hexaploid  
339 landraces. Intriguingly, the rise and fall of  $N_e$  of diploids, tetraploids, and hexaploids  
340 complemented each other in the Holocene timeline even without impact from drastic climate  
341 change of glacial periods (Supplementary Fig. 37). Archeological studies showed that  
342 domesticated einkorn and domesticated emmer thrived since the Neolithic Age until they  
343 were gradually replaced by durum wheat (*T. turgidum* ssp. *durum*, AABB), spelt, and bread  
344 wheat during the Bronze Age (~5,000 BP - ~3,000 BP)<sup>6,24</sup>. The  $N_e$  fluctuation of wheats  
345 coincides with the shifts of human food choice from einkorn and emmer wheat to bread wheat.  
346 Despite largely being a natural evolutionary process, the population size decline of wild  
347 wheats is disturbing—the  $N_e$  of diploids and tetraploids in *Triticum* was reduced by 81.70%  
348 in the past two thousand years (Fig. 5a).

349

350 Rapid climate change is likely to impact the biodiversity of wheats profoundly<sup>50</sup>. To  
351 evaluate the adaptive capacity of *Triticum-Aegilops* species, we conducted biogeographical  
352 modeling to predict the response of wheats to the future climate. For bread wheat, we used a  
353 tree-based machine learning approach, gradient forest, to model allele frequency of genome-  
354 wide SNPs from 13 populations (Supplementary Fig. 30 and 39) with 19 bioclimatic  
355 variables. The adaptation-associated SNPs identified previously (Supplementary Fig. 33)  
356 presented a much faster turnover rate along environmental gradient than the randomly chosen  
357 SNPs (Supplementary Fig. 40). Using the adaptation-associated SNPs, we predicted the shift  
358 of allele frequency, namely genetic offset, of local landraces between present and future  
359 climates during 2040-2060 and 2080-2100. Local bread wheat populations showed varying

360 degrees of genetic offset, with the highest value appearing in regions of the Indus Valley and  
361 Inner Asia, indicating that wheat production in the two regions is the most vulnerable to  
362 climate change (Fig. 5b, c and Supplementary Fig. 41). Since we did not have a large enough  
363 sample size to model allele frequency of individual wild wheat populations, we used Species  
364 Distribution Modeling (SDM)<sup>51</sup> to predict the future habitats of wild wheats. Overall, we  
365 observed either a contraction of wild wheats' habitats or shifting of their geographical ranges  
366 to the north (Supplementary Fig. 42-45). As such, two of the critical progenitors of bread  
367 wheat, wild emmer and strangulata (Fig. 1c), clearly showed the projected change of species  
368 distribution (Fig. 5d). It is worth noting that wild emmer, which is the ultimate source of  
369 genetic diversity of bread wheat<sup>52</sup>, may become a threatened species requiring conservation  
370 in a few decades.

371

## 372 **Discussion**

373 The changing climate is threatening global food security<sup>53</sup>. The evolution of major crops  
374 through immense space and time provides an unparalleled opportunity to dissect the  
375 environmental adaptation of plants and further help address the climate challenge. The  
376 population history of bread wheat and its wild relatives has long been controversial<sup>6,21,24</sup>. By  
377 leveraging a comprehensive set of genomes from the genera *Triticum* and *Aegilops*, we  
378 systematically unraveled the spatiotemporal history of bread wheat and its wild relatives in  
379 the Holocene, in particular the origin and range expansion of bread wheat, population size  
380 dynamics of wild wheats, and hybridization events between the two groups. We also found  
381 the high-altitude adaption of Tibetan landraces through a stop-gain allele of an essential  
382 flowering time gene (*Ppd-D1*). Remarkably, this allele and the other two independent loss-  
383 of-function alleles of *Ppd-D1* showed a pattern of convergent adaptation of bread wheat to  
384 early flowering across Eurasia, indicating the important role of evolutionary constraint in



385 shaping adaptive landscape of bread wheat. Meanwhile, the adaptive diversity demonstrates  
386 wild wheats as an invaluable resource providing pre-adapted alleles for wheat breeding.  
387 However, some of the most important wild populations exhibited a disturbing population  
388 decline driven by shifts of human food choice and environmental change, illustrating the  
389 pressing need to protect wild wheats. Taken together, our work of reconstructing the  
390 population history of *Triticum-Aegilops* species has laid an essential foundation to dissect  
391 the genetics of wheat adaptation effectively. It also provides a research paradigm to explore  
392 population history and adaptive genetic diversity for all crops. This study will facilitate well-  
393 informed efforts in protecting wheat biodiversity and breeding climate-resilient crops in the  
394 future.

## 395 **Online Methods**

### 396 **Sampling of wheat accessions**

397 A total of 795 accessions of bread wheat and its wild relatives (a.k.a. wheats) from 73  
398 countries were used in this study ([Supplementary Table 1](#)). This natural population contains  
399 6 species and 25 subspecies, covering all subspecies with AA, AABB, and AABBDD  
400 genome types in *Triticum*, as well as BB/SS, and DD genome types in *Aegilops*. We  
401 integrated 414 accessions from the VMap1.0<sup>13</sup>, 92 accessions from Northwest A&F  
402 University<sup>18</sup>, and 244 accessions sequenced at China Agricultural University<sup>17</sup>. In addition,  
403 to collect all possible genetic donors of bread wheat, we newly sequenced 50 additional  
404 accessions, including 10 accessions of speltoids (*Ae. speltoides* ssp. *speltoides*), 10  
405 accessions of spelt (*T. aestivum* ssp. *spelta*), 3 accessions of synthesis hexaploid wheat, and  
406 27 accessions of strangulata (*Ae. tauschii* ssp. *strangulata*) in this study ([Supplementary](#)  
407 [Table 2 and 3](#)). Plant materials are available at the Chinese Crop Germplasm Resources  
408 Information System (CGRIS), National Small Grains Collection (NSGC), and Genebank  
409 Gatersleben of Leibniz Institute of Plant Genetics and Crop Plant Research (IPK).

410

### 411 **Sequencing, reads mapping, and genetic variation discovery**

412 Newly added 50 samples were sequenced in two batches. The first batch of 27 accessions  
413 was sequenced with the BGISEQ500 machine using 100-base-pair pair-end reads. The  
414 second batch of 23 accessions was sequenced with the MGISEQ-2000RS machine using 150-  
415 base-pair pair-end reads ([Supplementary Table 3](#)). Reads with more than half of bases with  
416 a quality value of less than Q20 or more than 5% of 'N' bases were removed from the raw  
417 data. Given the different ploidy levels and genome types across the population, we applied a  
418 custom pipeline for genetic variation calling<sup>13</sup> ([Supplementary Fig. 2](#)). The reference genome  
419 (IWGSC RefSeq v1.0)<sup>12</sup> was divided into five taxonomic groups based on their genome types,

420 namely AA, BB/SS, AABB, AABBDD, and DD taxa, respectively. Then, all accessions were  
421 mapped to their corresponding reference with BWA-MEM<sup>54</sup>. GATK<sup>55</sup> was used to obtain the  
422 raw SNPs for each genome type. We used HaplotypeCaller of GATK with parameters of “--  
423 native-pair-hmm-threads 5 -L -R -I -O -ERC GVCF”. The SNP filtering procedures are the  
424 same as those applied in our previous work<sup>13</sup>.

425

### 426 **Construction of VMap 1.1 by merging SNPs from five genome types**

427 The taxa containing A, B, and D lineages have different coalescence times. When  
428 coalescence is deep, the reference bias of SNP calling can be severe. For a fair comparison  
429 between A, B, and D lineages, only SNPs in syntenic sites were retained in the final genetic  
430 variation dataset, as previously described<sup>13</sup>. Finally, we built the variation library of VMap  
431 1.1 (genetic variation map of wheat version 1.1), containing ~78M SNPs ([Supplementary](#)  
432 [Note. 1](#)). Then, we genotyped 795 accessions by scanning their bam files using HapScanner  
433 (<https://github.com/PlantGeneticsLab/TIGER/wiki/HapScanner>)<sup>13</sup>. The SNPs of VMap 1.1  
434 are summarized in [Supplementary Table 5](#).

435

### 436 **Reconstructing gene tree chronograms for genera *Triticum* and *Aegilops***

437 (1) Identification of orthologous genes across *Triticum* and *Aegilops*. *Hordeum vulgare*<sup>56</sup>,  
438 *Triticum urartu*<sup>57</sup>, *Aegilops tauschii*<sup>58</sup>, wild emmer<sup>27</sup>, durum<sup>59</sup>, Chinese Spring<sup>12</sup> were  
439 downloaded from ensemble plants (<http://plants.ensembl.org/index.html>). Ortholog  
440 prediction was carried out using SwiftOrtho<sup>60</sup> with default parameters. Results of SwiftOrtho  
441 were parsed into three groups of A, B, and D subgenomes. Finally, 4,971 reciprocal genes  
442 were found to estimate the phylogenetic history of the A, B, and D lineages.

443 (2) Local assembly of orthologous genes. As part of species within genera *Triticum* and  
444 *Aegilops* do not have reference genomes (e.g., einkorn and speltoides) that challenges

445 phylogeny reconstruction at the species level, we performed local assembly of orthologous  
446 genes for individual *Triticum-Aegilops* subspecies. First, fastq sequences of orthologous  
447 genes were extracted from bam files of 25 subspecies. Second, we assembled the fastq  
448 sequences for each gene of 25 subspecies with SRAssembler<sup>61</sup>. Third, the assembled  
449 segments were anchored to the reference genome of bread wheat<sup>12</sup>. Last, we used Muscle<sup>62</sup>  
450 to perform multiple sequence alignments, and only the sequence alignments longer than  
451 1,000 bp were kept in the final assembly-based gene sequences (4,806 reciprocal genes).

452 (3) Reconstruction of the species tree. We analyzed ortholog genes of each subspecies jointly  
453 in a coalescent analysis to clarify the relationship of the *Triticum* and *Aegilops* subspecies.  
454 Multispecies coalescent analysis was carried out in BEAST2<sup>63</sup> to calculate gene tree topology.  
455 All gene trees were rooted with *Hordeum vulgare* with a secondary normally distributed  
456 calibration in the root about 15 Mya<sup>7</sup>. The analysis was conducted under the HKY  
457 substitution model for each gene. MCMC chains were run for 50 million generations with  
458 parameters sampled every 10,000 generations. Analyses were examined for convergence in  
459 Tracer v1.7.1<sup>63</sup>, and a burn-in of 25 million generations was discarded. Those trees with mean  
460 posterior probability across all nodes of  $\geq 0.85$  were kept using TreeAnnotator v.2.5.1<sup>63</sup>.  
461 Finally, the global tree was made ultrametric using the chronos function in the ape R package  
462 (<http://ape-package.ird.fr/>) and drawn using ggtree<sup>64</sup> in R.

463

#### 464 **Population phylogenetic analysis**

465 We selected 150,000 random SNPs from corresponding subgenomes for each phylogeny  
466 reconstruction. Phylogenetic trees of each group were reconstructed using RAXML<sup>65</sup>  
467 software with 100 bootstrap replicates in the GTRGAMMA model, and the output tree was  
468 plotted in iTOL<sup>66</sup>. We reconstructed the tree using a 100-times bootstrap with barley as the  
469 outgroup for the A, B, AB, or D lineage. We reconstructed the tree using 100 bootstrap

470 replicates for the AB lineages with wild emmer as the outgroup. In addition, according to the  
471 outgroup of the hexaploid individuals closest to strangulata in the tree of D lineage, a tree of  
472 D subgenome in ABD genome type was constructed with 100 bootstrap replicates. The  
473 parameters of RAxML were “-f a -m GTRGAMMA -p 12,346 -x 12,346 -# 100.”

474

#### 475 **Population genetic differentiation statistics**

476 (1) Genetic distance between populations. Pairwise distances between the bread wheat and  
477 its progenitors in the whole-genome level were calculated as the fraction differences between  
478 pairs of samples for each individual using PLINK<sup>67</sup> with the formulation:  $1 - \text{IBS}$ , where IBS  
479 was identity by state. (2)  $F_{ST}$  values. We estimated  $F_{ST}$  values for populations using vcfTools<sup>68</sup>,  
480 and Weir and Cockerham’s calculation in 1 Mb non-overlapping windows. Pairwise  
481 comparisons between each subspecies in each lineage were calculated.

482

#### 483 **Speciation time estimation**

484 We used SMC++ v1.15.4 to reconstruct effective population size histories for each paired  
485 population separately<sup>29</sup>. To mitigate the effect of selection on the estimate of the most recent  
486 common ancestor, we filtered out SNP sites (1) within genes; (2) outside the possible regulate  
487 elements (3kb upstream and downstream of the gene). Next, VCF files containing 15 pseudo-  
488 diploid genotypes was generated from randomly selected 30 individuals, as the previous  
489 study for the self-fertilization plants<sup>69</sup>. We then partitioned VCF files into SMC haploblock  
490 files for each pair, and partitioned each chromosome by using the vcf2smc function in  
491 SMC++. Subsequently, we used a polarization error of 0.5 and the mutation rate of  $6.5 \times 10^{-9}$   
492 in the ESTIMATE function of SMC++ to estimate past effective population sizes<sup>70,71</sup> ( $N_e$ ).  
493 Results were scaled to real-time by applying a generation time of 1 year and plotted on a  
494 linear timescale.

495 In addition, we used the effective size dynamics of two subpopulations, calculating split  
496 times between subpopulations in a cross-coalescent framework of SMC++  
497 “OMP\_NUM\_THREADS=1 smc++ split”. Finally, confidence intervals were estimated  
498 from population divergence time based on 20 resampling replicates ([Supplementary Fig. 12](#)  
499 [and Supplementary Note. 3](#)).

500

### 501 **Model inference of demographic history**

502 We applied the site frequency spectrum (SFS) to infer demographic scenarios using  
503 coalescent simulations to approximate the likelihood of a given model. Demographic  
504 parameter estimation was implemented in *fastsimcoal* version 2.6<sup>33</sup>.

505 (1) Data preparation and processing. To estimate migration rates among AB lineages and D  
506 lineage, we generated the observed SFS file as the input of *fastsimcoal2* through the  
507 following steps: First, identifying the ancestral allele. *Hordeum vulgare*<sup>56</sup> and *Aegilops*  
508 *tauschii*<sup>58</sup> are the ancestral groups for AB lineages, while the *Hordeum vulgare* and *Triticum*  
509 *urartu*<sup>57</sup> are the same ancestral group for D lineage. The NUCmer program implemented in  
510 the latest release of MUMmer4<sup>72</sup> was used to align the genomes of the outgroups to that of  
511 Chinese Spring<sup>12</sup> with “--maxmatch -g 1,000 -c 90 -l 40”. Sites overlapping with VMap 1.1  
512 were retained to infer ancestral alleles. For biallelic SNPs, alleles identical in two outgroups  
513 were identified. Second, generating the site-frequency spectrum (SFS). In AB lineages, 20  
514 accessions were randomly selected from each subpopulation and paired subpopulations (wild  
515 emmer, domesticated emmer, free-threshing tetraploids, and bread wheat AB) produced 2D-  
516 SFS. In D lineage, 20 accessions were randomly selected from two subpopulations  
517 (strangulata and bread wheat D) that produced 2D-SFS. Here, we used easySFS  
518 (<https://github.com/isaacovercast/easySFS>) to convert the VCF to various SFS formats.

519 (2) Model selection and model fitting. Five demographic models (early GeneFlow, no gene  
520 flow, recent gene flow, different gene flow matrices, and constant gene flow) used the site  
521 frequency spectrum (SFS) to fit model parameters to the observed data by performing  
522 coalescent simulations. For each model, the fit to the observed SFS was maximized using the  
523 composite-likelihood method implemented in *fastsimcoal2* with the following options: “-N  
524 100,000 -L 50”, with other options by default. We used wide search ranges with log-uniform  
525 distributions for all parameter estimates and assumed a generation time of 1 year and a  
526 constant mutation rate of  $6.5 \times 10^{-9}$  mutation/generation/site. Subsequently, we performed  
527 100 independent *fastsimcoal2* runs for each demographic model to determine the parameter  
528 estimates leading to the maximum likelihood. We compared different gene flow scenarios in  
529 AB and D lineage to get the best-fitting model.

530 (3) Bootstrap analysis. We estimated confidence intervals for the model with maximum  
531 likelihood by estimating parameters on 50 bootstrap data sets. The bootstrap data sets were  
532 obtained by randomly re-sampling 20 accessions in specific subpopulations to match the  
533 original data set size. Then, for each bootstrapped dataset, we obtained SFS with easySFS  
534 software. Next, re-estimated parameters using the same settings as the original data set, but  
535 with 20 replicate runs instead of 100, due to computational constraints. To obtain the 95%  
536 confidence intervals, we calculated the 2.5% and 97.5% percentiles of the estimate  
537 distribution obtained with R.

538

### 539 **Population structure projected on the map**

540 We used population structure to provide insights into the migratory patterns of the bread  
541 wheat landrace. SNPs in D lineage were selected for ADMIXTURE<sup>73</sup> by applying the  
542 following criteria: (1) SNPs with linkage disequilibrium (LD) above 0.2 were removed using  
543 Plink “--indep-pairwise 50 10 0.2”, and (2) SNPs with  $MAF \geq 0.05$ . Geographical projections

544 of population structure were obtained using the `hclust` function in `cluster` package  
545 (<https://cran.r-project.org/web/packages/cluster/index.html>) in R. The spatial prediction was  
546 based on a Gaussian model, which supposes that the covariance matrix is stationary. We  
547 implemented the map projection by `mapPie` function in `rworldmap` package ([https://cran.r-](https://cran.r-project.org/web/packages/rworldmap/)  
548 [project.org/web/packages/rworldmap/](https://cran.r-project.org/web/packages/rworldmap/)) in R.

549

### 550 **Estimated effective migration surfaces**

551 Estimated effective migration surfaces (EEMS) is an approach to estimate genetic migration  
552 patterns according to a given geographic region<sup>34</sup>. We computed genetic dissimilarity  
553 matrices using EEMS and assigned geographical coordinates to each sample from each  
554 district to contrast geographic and genetic distances between demes. Migration surface  
555 contours were estimated using 800 demes for all sections of Eurasia. We ran MCMC analysis  
556 for 500,000 MCMC iterations, including 300,000 burn-in iterations, and repeated the process  
557 with different seeds to ensure the convergence of the MCMC chains with parameters by  
558 default.

559 Final spatial visualizations illustrating migratory surfaces were generated using R  
560 scripts provided by `EEMS.PLOT` function from the `rEEMSpots` package  
561 (<https://github.com/dipetkov/eems>). To test the robustness of the models, we applied a jack-  
562 knife sampling approach and repeated the EEMS runs after iteratively excluding isolates  
563 from a single district.

564

### 565 **Admixture graph modeling for landrace subpopulations in East and South Asia**

566 We sought to find explicit population history models that can infer the dispersal routes in  
567 East Asia. Therefore, we reconstructed admixture graphs<sup>74</sup> for Asian landrace subpopulations  
568 defined by the EEMS classification<sup>34</sup>. Bread wheat landraces in East and South Asia were



569 divided into ten subpopulations (R1-R10), and the individual list is available in  
570 [Supplementary Table 19](#). First, we filter the data set using the following criteria: SNPs with  
571 linkage disequilibrium (LD) above 0.2 were removed using Plink “--indep-pairwise 50 10  
572 0.2”, no more than 5% missing data. Second, the CONVERTF function from AdmixTools<sup>40</sup>  
573 was used to produce eigenstrat format data files, and the qpgraph function was used to  
574 evaluate whether graph models fit the data, using the West Asian population as an outgroup.

575 We then computed  $f_2$ -,  $f_3$ - and  $f_4$ -statistics measuring allele sharing of two, three, or four  
576 sets of subpopulations and reported the maximum  $|Z|$ -score between predicted and observed  
577 values. To explore the space of all possible admixture graphs, we used a heuristic search  
578 algorithm named qpbrute<sup>75</sup>. Given an outgroup with which to root the graph, a stepwise  
579 addition order algorithm was used for adding leaf nodes to the graph. At each step, the  
580 insertion of a new node was tested at all branches of the graph, except the outgroup branch  
581 (West Asia landrace). Where a node could not be inserted without producing  $f_4$  outliers  
582 ( $|Z| \geq 3$ ), then all possible admixture combinations were also attempted. If a node could not  
583 be inserted via either approach, that sub-graph was discarded. If the node was successfully  
584 inserted, the remaining nodes were recursively inserted into that graph. All possible starting  
585 node orders were attempted to ensure complete coverage of the graph space.

586 The effective use of qpGraph is to determine the relationships between subpopulations  
587 when the relationships indicated by phylogenetic trees are unclear<sup>76</sup>. We could put known  
588 subgroup relationships into the graph to reduce the amount of computation. We construct the  
589 admixture graphs of the South Asian and East Asian groups to fix the known structures using  
590 the heuristic search method, respectively. Then, the same heuristic algorithm was used to  
591 build the admixture graphs of 10 subpopulations. Finally, we fitted 61,214 possible  
592 admixture graph models and recorded the three graphs that left no  $f_4$  outliers ( $|Z| < 3$ ). We

593 then found the best-fit graph using the admixturegraph package<sup>77</sup> in R to compute the  
594 marginal likelihood of these three models and their Bayes Factors (BF).

595

### 596 **Phylogenetic-network analysis**

597 PhyloNet<sup>41</sup> inferred species hybridization events using the proportions of gene tree  
598 topologies to locate past hybridization within a phylogeny in the presence of incomplete  
599 lineage sorting. We inferred the hybridization events in *Triticum* through the following three  
600 steps. Firstly, get the individual ortholog gene trees. RAxML<sup>65</sup> was used to build an ML gene  
601 tree for each identified ortholog gene ( $n = 4,806$ ) under the GTRGAMMA substitution model.  
602 Subsequently, species networks modeled incomplete lineage sorting and gene flow using a  
603 pseudo-maximum likelihood approach were carried out with PHYLONET v.3.6.1<sup>41</sup> with the  
604 command “InferNetwork\_MPL” and using the individual gene trees. Finally, network  
605 searches were performed using only nodes in the rooted ML gene trees with bootstrap support  
606 of at least 75%, allowing for 0–4 reticulations and optimizing the branch lengths and  
607 inheritance probabilities of the returned species networks under pseudo-likelihood.

608

### 609 **Abiotic variables collection and redundancy analyses**

610 We downloaded climate-related variables data and altitude information from WorldClim  
611 (<https://www.worldclim.org/>), which provides monthly climate precipitation and  
612 temperature data at 30 seconds ( $\sim 1 \text{ km}^2$ ) resolution for the period 1,970-2,000. Then the  
613 EXTRACT function of R package RASTER v.3.3.13 ([https://cran.r-](https://cran.r-project.org/web/packages/raster)  
614 [project.org/web/packages/raster](https://cran.r-project.org/web/packages/raster)) was used for geographic data analysis. These climate  
615 variables included eleven temperature variables (Annual Mean Temperature, Mean Diurnal  
616 Range (Mean of monthly (max temp - min temp)), Isothermality (Temp2/Temp7) ( $\times 100$ ),  
617 Temperature Seasonality (standard deviation  $\times 100$ ), Max Temperature of Warmest Month,

618 Min Temperature of Coldest Month, Temperature Annual Range (Temp5-Temp6), Mean  
619 Temperature of Wettest Quarter, Mean Temperature of Driest Quarter, Mean Temperature  
620 of Warmest Quarter, Mean Temperature of Coldest Quarter) and eight precipitation variables  
621 (Annual Precipitation, Precipitation of Wettest Month, Precipitation of Driest Month,  
622 Precipitation Seasonality (Coefficient of Variation), Precipitation of Wettest Quarter,  
623 Precipitation of Driest Quarter, Precipitation of Warmest Quarter, Precipitation of Coldest  
624 Quarter).

625 We used redundancy analysis (RDA)<sup>43</sup> to identify multiple climate variables important  
626 for explaining SNP variance in bread wheat landraces. We ran RDA utilizing a subset of 20K  
627 randomly chosen SNPs with no missing and MAF >0.05 for response variables. Then, RDA  
628 with variance partitioning was conducted to quantify the proportion of genome-wide SNP  
629 variation explained by 20 abiotic categories variables. To identify abiotic variables associated  
630 with genome-wide divergence among different regions, we conducted RDA using three  
631 significant variables (temperature, precipitation, and altitude) for different regions, including  
632 West Asia (WA), Europe (EU), Inner Asia (IA), East Asia (EA) and Southern Himalaya (SH)  
633 groups. Finally, all RDAs were conducted using the R package VEGAN  
634 (<https://github.com/vegandevs/vegan>).

635

### 636 **Selective sweeps detection in different regions of bread wheat**

637 The XP-CLR statistic<sup>44</sup> was used to identify selective sweeps in different regions of bread  
638 wheat landraces. We divided Eurasian bread wheat landraces into five subgroups (West Asia,  
639 Europe, Inner Asia, East Asia, and Southern Himalaya) based on geographical, genetic, and  
640 ecological differences and calculated the selective sweep for each pair of subgroups. XP-  
641 CLR was run with the grid size of 10 kb, the maximum number of SNPs of 500 within a  
642 window, and the correlation level as 0.95. The genetic distance was estimated from the

643 recombination rate data from a previous publication<sup>12</sup>. The R package GenWin  
644 (<https://cran.r-project.org/web/packages/GenWin>) was used to normalize XP-CLR statistics  
645 and detect the boundary of genomic regions with smoothness = 2,000 and method = 4. We  
646 considered the top 5% of the statistic results from each population as the threshold under  
647 selective sweep and calculated different thresholds for different subgenomes.

648

#### 649 **Environmental association analysis in bread wheat**

650 Association between local environment and SNP frequency was identified using Bayenv  
651 2.0<sup>45</sup>. 20 environmental variables (11 temperature variables, 8 precipitation variables, and  
652 altitude) were obtained from the WorldClim (<https://worldclim.org/>). A total of 13 wheat  
653 populations was identified on the basis of geographic and environmental variables using the  
654 k-means approach implemented in R package cluster ([https://cran.r-](https://cran.r-project.org/web/packages/cluster)  
655 [project.org/web/packages/cluster](https://cran.r-project.org/web/packages/cluster)). To control for population structure, we used LD  
656 independent SNPs of A, B and D lineage (“--indep-pairwise 50 10 0.2”) to estimate the  
657 covariance matrix of 13 populations with 100,000 iterations. The association between the 1.5  
658 million SNPs and the 20 environmental variables was tested with 10,000 iterations for each  
659 SNP. The median value of the Bayes factor was calculated for each SNP using data from five  
660 independent Bayenv runs. The top 5% value of Bayes factor was set as the threshold to select  
661 environment associated SNPs for each of the 20 environmental variables.

662

#### 663 **Detecting adaptation-associated SNPs and genes**

664 The regions with the top 5% XP-CLR score and environment-associated SNPs were  
665 identified as adaptation-associated regions. Genes in such regions were considered candidate  
666 adaptation-associated genes. Next, we used the snpEff (version 5.0)<sup>78</sup> to annotate genetic

667 variations and predict the functional effects of SNPs in the longest transcript of adaptation-  
668 associated genes, based on the gene annotation of IWGSC gtf v1.1<sup>12</sup>.

669 For the *Ppd-D1* gene, known functional 5 bp deletion (33,953,310) and 16 bp insertion  
670 (33,952,522) loci genotypes were extracted from the raw VMap1.1 which contains the indels  
671 variants. The upstream ~2kb deletion was identified by profiling the reads depth in whole-  
672 genome sequencing data for each sample.

673

#### 674 **Population size fluctuation over time**

675 We used SMC++<sup>29</sup> to infer historical effective population sizes of bread wheat and its wild  
676 relatives. The SNP data pre-processing was as same as inferring speciation time of bread  
677 wheat. Both gene and regulatory regions were removed, and pseudo-diploid genotypes were  
678 generated for the self-fertilization plants<sup>69</sup> ([Supplementary Note. 3](#)). We set the upper bound  
679 of the number of generations as 100,000 and the lower bound to 100. We set the number of  
680 spline knots used in the internal representation of population size history to 30. The  
681 estimation process assumed a mutation rate of  $6.5 \times 10^{-9}$  mutation/generation/site. All other  
682 parameters were set to the default values. The final representation of the history of effective  
683 population size was made using a generation time of one year. To estimate the variance of  
684 effective population size in SMC++, we resampled the pseudo-diploid genotypes for each  
685 subpopulation ( $n = 20$ ). If the number of subspecies is less than 5, we repeat the coalescent  
686 process of the same samples for 20 times. Finally, we plotted all independent SMC++  
687 analyses for each considered subpopulation. The combined result was drawn in R using the  
688 "stat\_smooth" function, and the confidence interval level is 0.95.

689

#### 690 **Estimating the genetic offset of bread wheat in the future climates**

691 Biogeographical modeling was used to identify environmental factors important to allele  
692 frequency change and to detect how allele frequency shifts along that factors<sup>79</sup>. We divided  
693 225 bread wheat landraces into 13 populations as described previously. We tested two sets  
694 of SNPs for modeling using gradient forest<sup>80</sup>. One SNP set was created by randomly choosing  
695 30,000 SNPs from 225 samples. The other was a random selection of 30,000 SNPs from the  
696 adaptation-associated SNPs described previously.

697 We extended the gradient forest analysis to predict “genetic offset (GO)”<sup>79</sup>. Here,  
698 “genomic offset” measures the mismatch between current genotype and projected genotype  
699 in the future environment using associations across current environment gradients as a  
700 baseline<sup>81,82</sup>. Based on the NorESM1-M Global Climate Model (GCM), the future climate  
701 variables of 2050 (2040-2060) and 2090 (2080-2100) under four different greenhouse gas  
702 scenarios, Representative Concentration Pathways (RCPs), including RCP2.6, RCP4.5,  
703 RCP6.0, and RCP8.5, were retrieved from WorldClim (<https://worldclim.org/>). Those four  
704 RCPs represent different gas emission scenarios, reflecting conditions ranging from  
705 moderate (RCP2.6) to the extreme (RCP8.5)<sup>83</sup>. Nineteen bioclimatic variables from both  
706 current and predicted climates were transformed for each raster based on importance in  
707 predicting genomic variation using the gradient forest model. The Euclidean distance  
708 between the current and projected future values is the genetic offset of individual populations.  
709 The genetic offset was predicted by package gradientForest ([https://gradientforest.r-forge.r-](https://gradientforest.r-forge.r-project.org/)  
710 [project.org/](https://gradientforest.r-forge.r-project.org/)) and projected by package rasterVis ([https://cran.r-](https://cran.r-project.org/web/packages/rasterVis/index.html)  
711 [project.org/web/packages/rasterVis/index.html](https://cran.r-project.org/web/packages/rasterVis/index.html)) in R.

712

### 713 **Species distribution modeling**

714 Species distribution models (SDMs) combine observations of species distribution with  
715 environmental estimates<sup>51</sup>. We implemented correlative species distribution using

716 geographic coordinates of bread wheat and its wild relatives retrieved from online germplasm  
717 databases, such as the U.S. National Plant Germplasm System ([https://npgsweb.ars-](https://npgsweb.ars-grin.gov/gringlobal/search)  
718 [grin.gov/gringlobal/search](https://npgsweb.ars-grin.gov/gringlobal/search)) to construct species distribution models (SDM)<sup>84,85</sup>. Nineteen  
719 environmental predictors retrieved from WorldClim (<https://worldclim.org/>) were used in  
720 our final SDM modeling. SDMs were then generated with package dismo in R ([https://cran.r-](https://cran.r-project.org/web/packages/dismo/index.html)  
721 [project.org/web/packages/dismo/index.html](https://cran.r-project.org/web/packages/dismo/index.html)) with three modeling algorithms, Generalized  
722 Additive Models, Generalized Linear Models, and Random Forests. The species occurrence  
723 data were combined with 50 pseudo-absence data that were randomly generated within the  
724 area of study. Models were trained using 70% of data and tested with the remaining 30%.  
725 Each modeling algorithm was run 100 times and was evaluated via true skill statistics (TSS).  
726 The final models were then used for each species to project the potential distribution of each  
727 species under both current and projected future climatic (2040-2060 and 2080-2100)  
728 conditions.

729 **References:**

- 730 1. Ray, D. K., Mueller, N. D., West, P. C. & Foley, J. A. Yield Trends Are Insufficient  
731 to Double Global Crop Production by 2050. *PLoS One* **8**, e66428 (2013).
- 732 2. Bailey-Serres, J., Parker, J. E., Ainsworth, E. A., Oldroyd, G. E. D. & Schroeder, J. I.  
733 Genetic strategies for improving crop yields. *Nature* **575**, 109–118 (2019).
- 734 3. Hickey, L. T. *et al.* Breeding crops to feed 10 billion. *Nat. Biotechnol.* **37**, 744–754  
735 (2019).
- 736 4. Castañeda-Álvarez, N. P. *et al.* Global conservation priorities for crop wild relatives.  
737 *Nat. Plants* **2**, 1–6 (2016).
- 738 5. Shiferaw, B. *et al.* Crops that feed the world 10. Past successes and future challenges  
739 to the role played by wheat in global food security. *Food Secur.* **5**, 291–317 (2013).
- 740 6. Salamini, F., Özkan, H., Brandolini, A., Schäfer-Pregl, R. & Martin, W. Genetics and  
741 geography of wild cereal domestication in the near east. *Nat. Rev. Genet.* **3**, 429–441  
742 (2002).
- 743 7. Marcussen, T. *et al.* Ancient hybridizations among the ancestral genomes of bread  
744 wheat. *Science* **345**, 1250092 (2014).
- 745 8. Glémin, S. *et al.* Pervasive hybridizations in the history of wheat relatives. *Sci. Adv.*  
746 **5**, eaav9188 (2019).
- 747 9. Pont, C. *et al.* Tracing the ancestry of modern bread wheats. *Nat. Genet.* **51**, 905–911  
748 (2019).
- 749 10. Diamond, J. M. *Guns, germs, and steel: the fates of human societies*. (New York :  
750 Norton, [2005]).
- 751 11. Harari, Y. N. author. *Sapiens: a brief history of humankind*. (First U.S. edition. New  
752 York : Harper, [2015]).
- 753 12. International Wheat Genome Sequencing Consortium (IWGSC). Shifting the limits in



- 754 wheat research and breeding using a fully annotated reference genome. *Science* **361**,  
755 eaar7191 (2018).
- 756 13. Zhou, Y. *et al.* Triticum population sequencing provides insights into wheat adaptation.  
757 *Nat. Genet.* **52**, 1412–1422 (2020).
- 758 14. Zhou, Y. *et al.* Introgressing the *Aegilops tauschii* genome into wheat as a basis for  
759 cereal improvement. *Nat. Plants* **7**, 774–786 (2021).
- 760 15. Balfourier, F. *et al.* Worldwide phylogeography and history of wheat genetic diversity.  
761 *Sci. Adv.* **5**, eaav0536 (2019).
- 762 16. He, F. *et al.* Exome sequencing highlights the role of wild-relative introgression in  
763 shaping the adaptive landscape of the wheat genome. *Nat. Genet.* **51**, 896–904 (2019).
- 764 17. Guo, W. *et al.* Origin and adaptation to high altitude of Tibetan semi-wild wheat. *Nat.*  
765 *Commun.* **11**, 1–12 (2020).
- 766 18. Cheng, H. *et al.* Frequent intra- and inter-species introgression shapes the landscape  
767 of genetic variation in bread wheat. *Genome Biol.* **20**, 136 (2019).
- 768 19. Gaurav, K. *et al.* Population genomic analysis of *Aegilops tauschii* identifies targets  
769 for bread wheat improvement. *Nat. Biotechnol.* (2021).
- 770 20. Matsuoka, Y. Evolution of Polyploid Triticum Wheats under Cultivation: The Role of  
771 Domestication, Natural Hybridization and Allopolyploid Speciation in their  
772 Diversification. *Plant Cell Physiol.* **52**, 750–764 (2011).
- 773 21. Zhao, X., Fu, X., Yin, C. & Lu, F. Wheat speciation and adaptation: perspectives from  
774 reticulate evolution. *aBIOTECH* **2**, 386–402 (2021).
- 775 22. Ramu, P. *et al.* Cassava haplotype map highlights fixation of deleterious mutations  
776 during clonal propagation. *Nat. Genet.* **49**, 959–963 (2017).
- 777 23. Meyer, R. S. & Purugganan, M. D. Evolution of crop species: Genetics of  
778 domestication and diversification. *Nature Reviews Genetics* **14**, 840–852 (2013).

- 779 24. Faris, J. D. Wheat domestication: Key to agricultural revolutions past and future. in  
780 *Genomics of Plant Genetic Resources: Volume 1. Managing, Sequencing and Mining*  
781 *Genetic Resources* (eds. Tuberosa, R., Graner, A. & Frison, E.) 439–464 (Springer  
782 Netherlands, 2014).
- 783 25. Wang, J. *et al.* Aegilops tauschii single nucleotide polymorphisms shed light on the  
784 origins of wheat D-genome genetic diversity and pinpoint the geographic origin of  
785 hexaploid wheat. *New Phytol.* **198**, 925–937 (2013).
- 786 26. Luo, M.-C. *et al.* The structure of wild and domesticated emmer wheat populations,  
787 gene flow between them, and the site of emmer domestication. *Theor. Appl. Genet.*  
788 **114**, 947–959 (2007).
- 789 27. Avni, R. *et al.* Wild emmer genome architecture and diversity elucidate wheat  
790 evolution and domestication. *Science* **357**, 93–97 (2017).
- 791 28. Nesbitt, M. & Samuel, D. From staple crop to extinction? The archaeology and history  
792 of the hulled wheats. *Hulled wheats. Proc. First Int. Work. Hulled Wheats* **4**, 41–100  
793 (1996).
- 794 29. Terhorst, J., Kamm, J. A. & Song, Y. S. Robust and scalable inference of population  
795 history from hundreds of unphased whole genomes. *Nat. Genet.* **49**, 303–309 (2017).
- 796 30. Araus, J. L., Slafer, G. A., Romagosa, I. & Molist, M. FOCUS: Estimated wheat yields  
797 during the emergence of agriculture based on the carbon isotope discrimination of  
798 grains: Evidence from a 10th millennium BP site on the euphrates. *J. Archaeol. Sci.* **28**,  
799 341–350 (2001).
- 800 31. Purugganan, M. D. Evolutionary Insights into the Nature of Plant Domestication. *Curr.*  
801 *Biol.* **29**, R705–R714 (2019).
- 802 32. Edelman, N. B. *et al.* Genomic architecture and introgression shape a butterfly  
803 radiation. *Science* **366**, 594–599 (2019).

- 804 33. Excoffier, L., Dupanloup, I., Huerta-Sánchez, E., Sousa, V. C. & Foll, M. Robust  
805 demographic inference from genomic and SNP data. *PLoS Genet.* **9**, e1003905 (2013).
- 806 34. Petkova, D., Novembre, J. & Stephens, M. Visualizing spatial population structure  
807 with estimated effective migration surfaces. *Nat. Genet.* **48**, 94–100 (2015).
- 808 35. Zhou, X. *et al.* 5,200-year-old cereal grains from the eastern Altai Mountains redate  
809 the trans-Eurasian crop exchange. *Nat. Plants* **6**, 78–87 (2020).
- 810 36. Long, T. *et al.* The early history of wheat in China from 14C dating and Bayesian  
811 chronological modelling. *Nat. Plants* **4**, 272–279 (2018).
- 812 37. Liu, X. *et al.* From ecological opportunism to multi-cropping: Mapping food  
813 globalisation in prehistory. *Quat. Sci. Rev.* **206**, 21–28 (2019).
- 814 38. Stevens, C. J. *et al.* Between China and South Asia: A Middle Asian corridor of crop  
815 dispersal and agricultural innovation in the Bronze Age. *The Holocene* **26**, 1541–1555  
816 (2016).
- 817 39. Betts, A., Jia, P. W. & Dodson, J. The origins of wheat in China and potential pathways  
818 for its introduction: A review. *Quat. Int.* **348**, 158–168 (2014).
- 819 40. Patterson, N. *et al.* Ancient admixture in human history. *Genetics* **192**, 1065–1093  
820 (2012).
- 821 41. Than, C., Ruths, D. & Nakhleh, L. PhyloNet: A software package for analyzing and  
822 reconstructing reticulate evolutionary relationships. *BMC Bioinformatics* **9**, 1–16  
823 (2008).
- 824 42. Mac Key, J. Species relationship in Triticum. *Hereditas Suppl.* **2**, 237–275 (1966).
- 825 43. van den Wollenberg, A. L. Redundancy analysis an alternative for canonical  
826 correlation analysis. *Psychom. 1977 422* **42**, 207–219 (1977).
- 827 44. Chen, H., Patterson, N. & Reich, D. Population differentiation as a test for selective  
828 sweeps. *Genome Res.* **20**, 393–402 (2010).

- 829 45. Günther, T. & Coop, G. Robust identification of local adaptation from allele  
830 frequencies. *Genetics* **195**, 205–220 (2013).
- 831 46. Liang, Y., Liu, H. J., Yan, J. & Tian, F. Natural Variation in Crops: Realized  
832 Understanding, Continuing Promise. *Annu. Rev. Plant Biol.* **72**, 357–385 (2021).
- 833 47. Beales, J., Turner, A., Griffiths, S., Snape, J. W. & Laurie, D. A. A Pseudo-Response  
834 Regulator is misexpressed in the photoperiod insensitive Ppd-D1a mutant of wheat  
835 (*Triticum aestivum* L.). *Theor. Appl. Genet.* **115**, 721–733 (2007).
- 836 48. Guo, Z., Song, Y., Zhou, R., Ren, Z. & Jia, J. Discovery, evaluation and distribution  
837 of haplotypes of the wheat Ppd-D1 gene. *New Phytol.* **185**, 841–851 (2010).
- 838 49. Tanno, K. I. & Willcox, G. How fast was wild wheat domesticated? *Science* **311**, 1886  
839 (2006).
- 840 50. Scheffers, B. R. *et al.* The broad footprint of climate change from genes to biomes to  
841 people. *Science (New York, N.Y.)* **354**, aaf7671 (2016).
- 842 51. Elith, J. & Leathwick, J. R. Species distribution models: Ecological explanation and  
843 prediction across space and time. *Annu. Rev. Ecol. Evol. Syst.* **40**, 677–697 (2009).
- 844 52. M., S. A. *et al.* Precipitation drives global variation in natural selection. *Science* **355**,  
845 959–962 (2017).
- 846 53. Anderson, R., Bayer, P. E. & Edwards, D. Climate change and the need for agricultural  
847 adaptation. *Current Opinion in Plant Biology* **56**, 197–202 (2020).
- 848 54. Li, H. Aligning sequence reads, clone sequences and assembly contigs with BWA-  
849 MEM. *arXiv* **00**, 1–3 (2013).
- 850 55. Aaron McKenna *et al.* The Genome Analysis Toolkit: A MapReduce framework for  
851 analyzing next-generation DNA sequencing data. *Genome Res.* 254–260 (2009).
- 852 56. Mascher, M. *et al.* A chromosome conformation capture ordered sequence of the  
853 barley genome. *Nature* **544**, 427–433 (2017).

- 854 57. Ling, H. Q. *et al.* Genome sequence of the progenitor of wheat A subgenome *Triticum*  
855 *urartu*. *Nature* **557**, 424–428 (2018).
- 856 58. Luo, M. C. *et al.* Genome sequence of the progenitor of the wheat D genome *Aegilops*  
857 *tauschii*. *Nature* **551**, 498–502 (2017).
- 858 59. Maccaferri, M. *et al.* Durum wheat genome highlights past domestication signatures  
859 and future improvement targets. *Nat. Genet.* **51**, 885–895 (2019).
- 860 60. Hu, X. & Friedberg, I. SwiftOrtho: A fast, memory-efficient, multiple genome  
861 orthology classifier. *Gigascience* **8**, 1–12 (2019).
- 862 61. McCarthy, T. W., Chou, H. C. & Brendel, V. P. SRAssembler: Selective Recursive  
863 local Assembly of homologous genomic regions. *BMC Bioinformatics* **20**, 1–13  
864 (2019).
- 865 62. Edgar, R. C. MUSCLE: A multiple sequence alignment method with reduced time and  
866 space complexity. *BMC Bioinformatics* **5**, 1–19 (2004).
- 867 63. Drummond, A. J., Suchard, M. A., Xie, D. & Rambaut, A. Bayesian phylogenetics  
868 with BEAUti and the BEAST 1.7. *Mol. Biol. Evol.* **29**, 1969–1973 (2012).
- 869 64. Yu, G., Smith, D. K., Zhu, H., Guan, Y. & Lam, T. T. Y. Ggtree: an R Package for  
870 Visualization and Annotation of Phylogenetic Trees With Their Covariates and Other  
871 Associated Data. *Methods Ecol. Evol.* **8**, 28–36 (2017).
- 872 65. Stamatakis, A. RAxML version 8: A tool for phylogenetic analysis and post-analysis  
873 of large phylogenies. *Bioinformatics* **30**, 1312–1313 (2014).
- 874 66. Letunic, I. & Bork, P. Interactive tree of life (iTOL) v3: an online tool for the display  
875 and annotation of phylogenetic and other trees. *Nucleic Acids Res.* **44**, W242–W245  
876 (2016).
- 877 67. Purcell, S. *et al.* PLINK: A tool set for whole-genome association and population-  
878 based linkage analyses. *Am. J. Hum. Genet.* **81**, 559–575 (2007).

- 879 68. Danecek, P. *et al.* The variant call format and VCFtools. *Bioinformatics* **27**, 2156–  
880 2158 (2011).
- 881 69. Cubry, P. *et al.* The Rise and Fall of African Rice Cultivation Revealed by Analysis  
882 of 246 New Genomes. *Curr. Biol.* **28**, 2274–2282.e6 (2018).
- 883 70. Gutaker, R. M. *et al.* Genomic history and ecology of the geographic spread of rice.  
884 *Nat. Plants* **6**, 492–502 (2020).
- 885 71. Zeng, X. *et al.* Origin and evolution of qingke barley in Tibet. *Nat. Commun.* **9**, 1–11  
886 (2018).
- 887 72. Marçais, G. *et al.* MUMmer4: A fast and versatile genome alignment system. *PLoS*  
888 *Comput. Biol.* **14**, e1005944 (2018).
- 889 73. Alexander, D. H., Novembre, J. & Lange, K. Fast model-based estimation of ancestry  
890 in unrelated individuals. *Genome Res.* **19**, 1655–1664 (2009).
- 891 74. Peter, B. M. Admixture, Population Structure and F-statistics. *Genetics* **202**, 1485–  
892 1501 (2016).
- 893 75. Máire Ní, L. *et al.* The Evolutionary History of Dogs in the Americas. *Science* **85**, 81–  
894 85 (2018).
- 895 76. Lipson, M. Applying f4-statistics and admixture graphs: Theory and examples. *Mol.*  
896 *Ecol. Resour.* **20**, 1658–1667 (2020).
- 897 77. Leppälä, K., Nielsen, S. V. & Mailund, T. Admixturegraph: An R package for  
898 admixture graph manipulation and fitting. *Bioinformatics* **33**, 1738–1740 (2017).
- 899 78. Cingolani, P. *et al.* A program for annotating and predicting the effects of single  
900 nucleotide polymorphisms, SnpEff: SNPs in the genome of *Drosophila melanogaster*  
901 strain w1118; iso-2; iso-3. *Fly (Austin)*. **6**, 80–92 (2012).
- 902 79. Fitzpatrick, M. C. & Keller, S. R. Ecological genomics meets community-level  
903 modelling of biodiversity: Mapping the genomic landscape of current and future

- 904 environmental adaptation. *Ecol. Lett.* **18**, 1–16 (2015).
- 905 80. Ellis, N., Smith, S. J. & Roland Pitcher, C. Gradient forests: Calculating importance  
906 gradients on physical predictors. *Ecology* **93**, 156–168 (2012).
- 907 81. Fitzpatrick, M. C., Chhatre, V. E., Soolanayakanahally, R. Y. & Keller, S. R.  
908 Experimental support for genomic prediction of climate maladaptation using the  
909 machine learning approach Gradient Forests. *Mol. Ecol. Resour.* **21**, 2749–2765  
910 (2021).
- 911 82. Fitzpatrick, M. C., Keller, S. R. & Lotterhos, K. E. Genomic signals of selection  
912 predict climate-driven population declines in a migratory bird. *Science* **361**, 83–86  
913 (2018).
- 914 83. van Vuuren, D. P. *et al.* The representative concentration pathways: An overview.  
915 *Clim. Change* **109**, 5–31 (2011).
- 916 84. Aguirre-Liguori, J. A., Ramírez-Barahona, S. & Gaut, B. S. The evolutionary  
917 genomics of species' responses to climate change. *Nat. Ecol. Evol.* **5**, 1350–1360  
918 (2021).
- 919 85. Thuiller, W., Guéguen, M., Renaud, J., Karger, D. N. & Zimmermann, N. E.  
920 Uncertainty in ensembles of global biodiversity scenarios. *Nat. Commun.* **10**, 1–9  
921 (2019).
- 922

923 **Acknowledgements:**

924 We thank Yalong Guo, and Song Ge (Institute of Botany, Chinese Academy of Sciences) for  
925 their suggestions. This work is supported by the Strategic Priority Research Program of the  
926 Chinese Academy of Sciences (XDA24020201), the National Natural Science Foundation of  
927 China (31921005 and 31970631), and the Strategic Priority Research Program of the Chinese  
928 Academy of Sciences (XDA24040102).

929

930 **Author contributions:**

931 X.Z. and Y.G. performed data analysis, plotted manuscript figures, and drafted the  
932 manuscript; Y.L., C.Y. and J. W. collected plant materials; L.P., A.B., X.S., D.X., Z.Z., J.Z.,  
933 J.X., X.Y., S.X., M.Z, and P.K. helped with data analysis. X.F. and Z.L. contributed to project  
934 coordination. F.L. conceived the idea, coordinated the project, and wrote the final manuscript.  
935 All authors discussed the results and commented on the manuscript.

936

937 **Competing interests:**

938 The authors declare no competing interests.

939

940 **Data availability statement:**

941 The raw sequence data were deposited in the Genome Sequence Archive  
942 (<https://ngdc.cncb.ac.cn/gsa/>) under the accession number of PRJCA005979. The genotype  
943 data from VMap 1.1 are publicly available at the Genome Variation Map  
944 (<https://bigd.big.ac.cn/gvm>) under accession number GVM000272.

945

946 **Code availability statement**



947 The custom code for demographic history is available at

948 [https://github.com/xuebozhao16/VMap1.1-Population\\_history\\_of\\_wheats](https://github.com/xuebozhao16/VMap1.1-Population_history_of_wheats)

949 **Figure legends:**

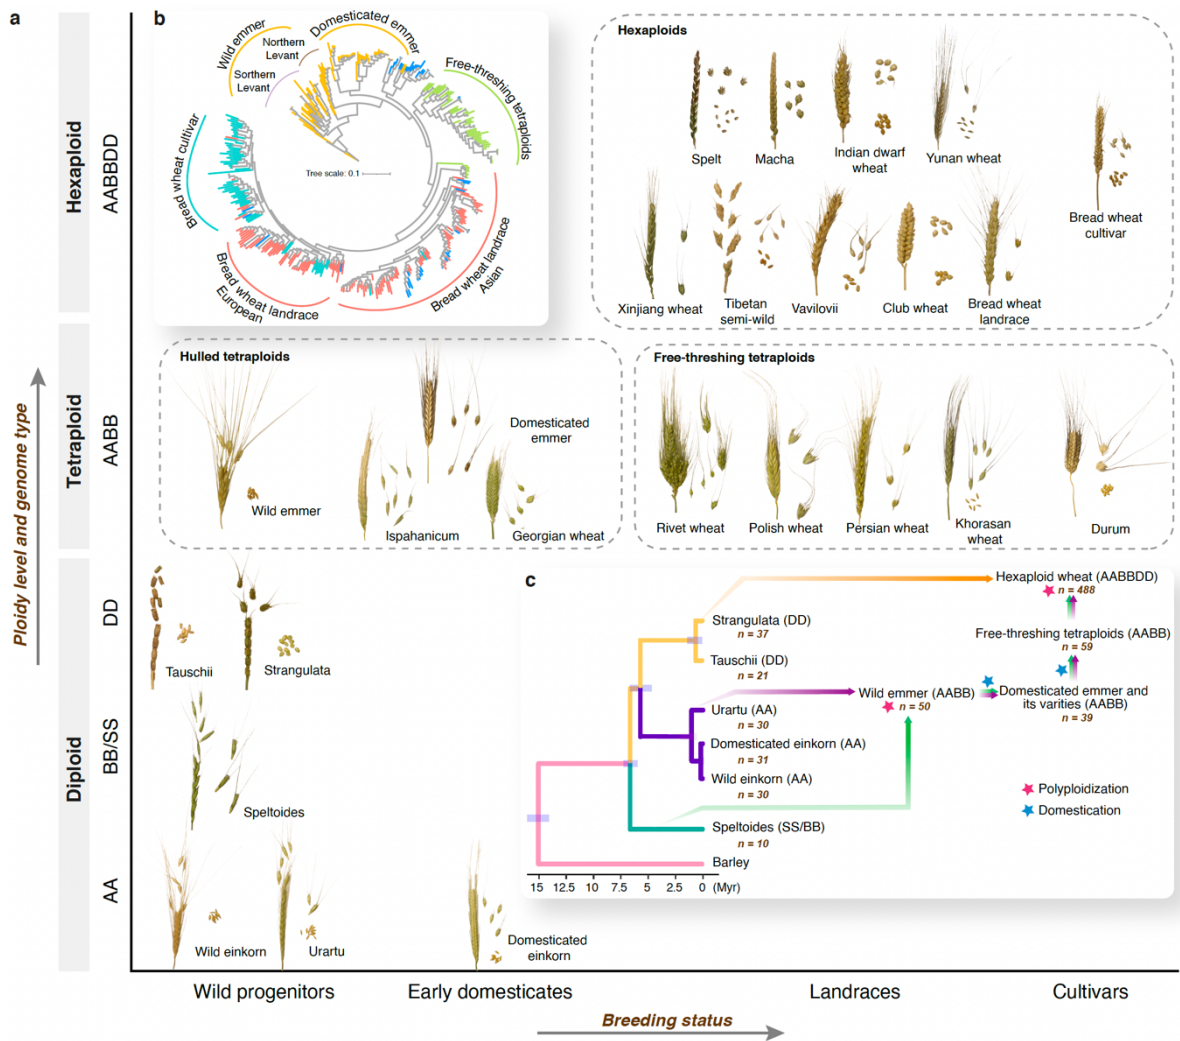

950

951 **Fig. 1 | The representative collection of wheats in this study. a**, Common name, spike  
 952 morphology, ploidy level, genome type, and breeding status of wheat accessions. **b**,  
 953 Relationship of wheat accessions in the AB lineage illustrated by the phylogeny tree with  
 954 wild emmer as the outgroup. **c**, Evolutionary relationship of bread wheat and its wild  
 955 progenitors in the genera *Triticum* and *Aegilops*. The sample size of the individual taxa was  
 956 labeled. The chronogram of the phylogeny was obtained by calculating the divergence of  
 957 orthologous genes between species (Methods and Supplementary Fig. 9).

958

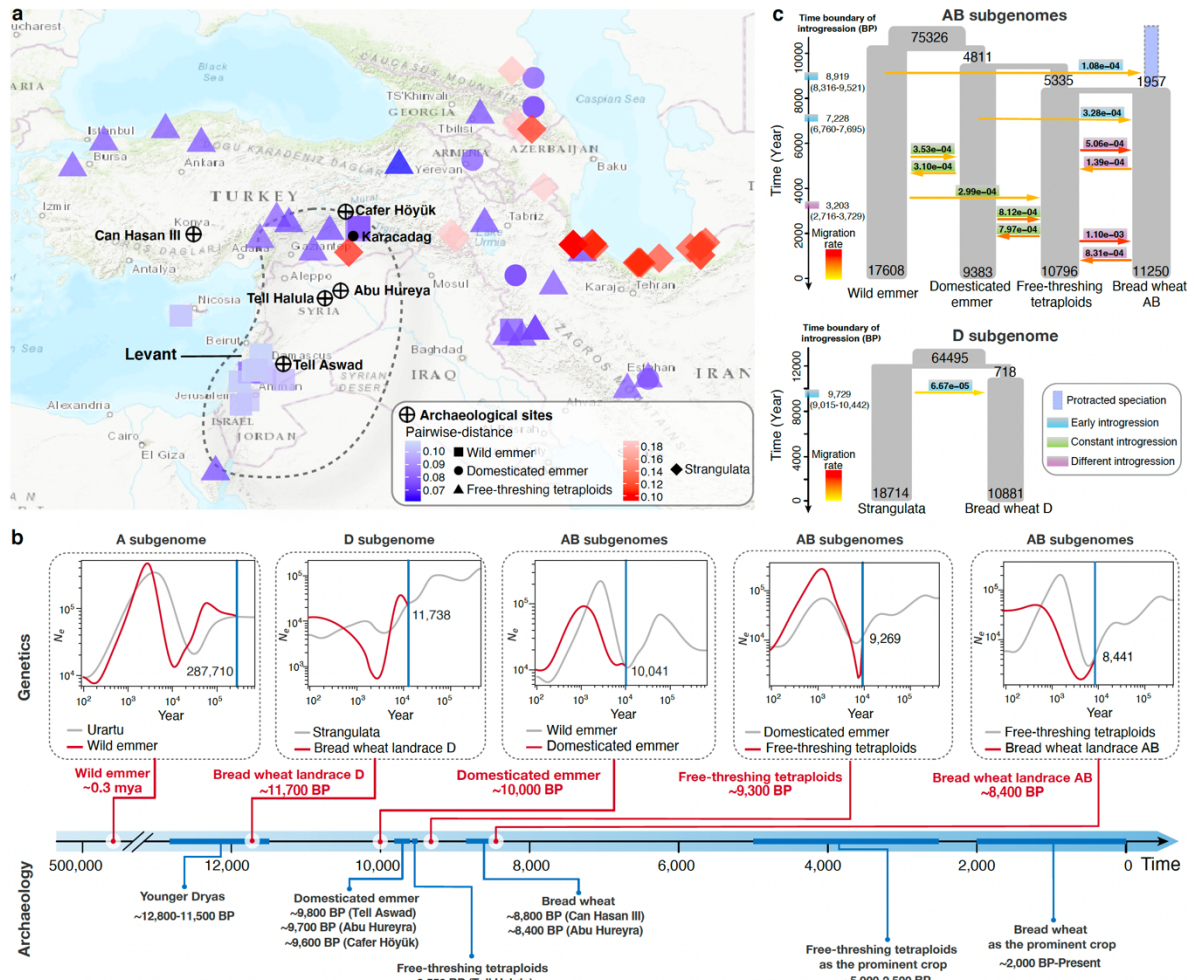

959

960 **Fig. 2 | Demographic models of the bread wheat speciation.** **a**, A geographic affiliation of  
 961 IBS distances across bread wheat and its progenitors. Color scale indicates the distance of  
 962 the AB subgenomes (blue) and the D subgenomes (red) between bread wheat and progenitors.  
 963 The map was created using the R package rworldmap. **b**, Timeline of evolutionary events  
 964 related to bread wheat speciation. The top is the timeline of population split between wheats  
 965 inferred from SMC++. The bottom is the wheat evolutionary timeline derived from  
 966 archaeological evidence. **c**, The best supported demographic model of the speciation and  
 967 introgression in wheats for AB subgenomes and D subgenome. The width of each grey  
 968 rectangle indicates the estimated effective population size ( $N_e$ ). Arrows among the grey  
 969 rectangles are the migration rates ( $m$ ) among different populations, and only  $2N_e m > 1$  is  
 970 shown. The colored rectangle at the timeline indicates the time boundary of introgression.

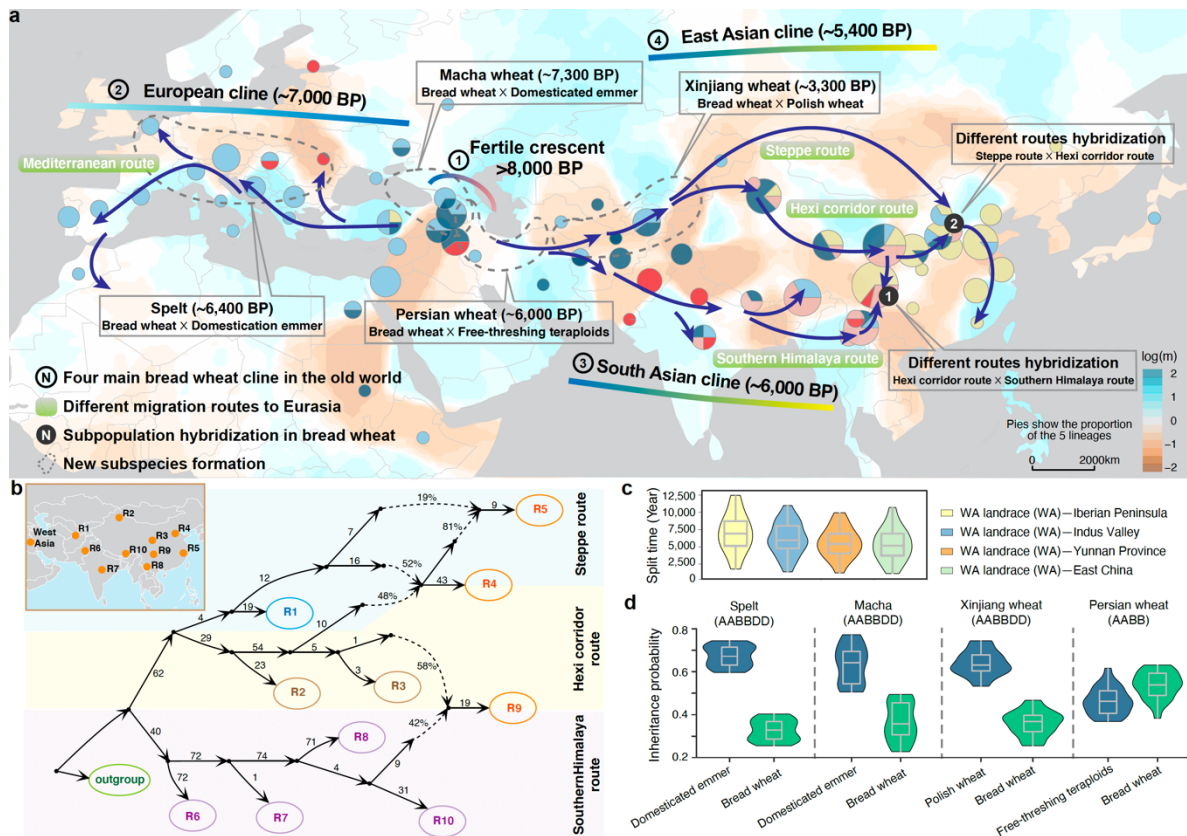

971

972 **Fig. 3 | Trans-Eurasian expansion of bread wheat.** **a**, Proposed dispersal routes of bread  
 973 wheat in Eurasia. The map colors showed the estimated effective migration surfaces (EEMS)  
 974 representing migration barriers (orange) and channels (cyan). Pies on the map showed the  
 975 ancestral proportion of the five lineages. Arrows were the estimated migration routes from  
 976 the Fertile Crescent to Europe and Asia. Boxes mark subpopulation hybridization and new  
 977 subspecies formation events, and the stippled areas represent the regions where the  
 978 hybridization events took place. **b**, Admixture graph model identifies the hybridization  
 979 events of bread wheat in ten regions along the eastward route. Solid lines with arrowheads  
 980 represent uniform ancestries, and attached numbers show scaled drift parameter  $f_2$ . Dashed  
 981 lines represent mixed ancestries, and attached values indicate estimated proportion of  
 982 ancestry. **c**, Distribution of split times estimated from cross-coalescence analysis of different  
 983 regions. The median and quartiles with whiskers reaching up to 1.5 times the interquartile  
 984 range are shown in boxplots. **d**, Inheritance probability of four *Triticum* subspecies formed  
 985 through hybridization during bread wheat dispersal.

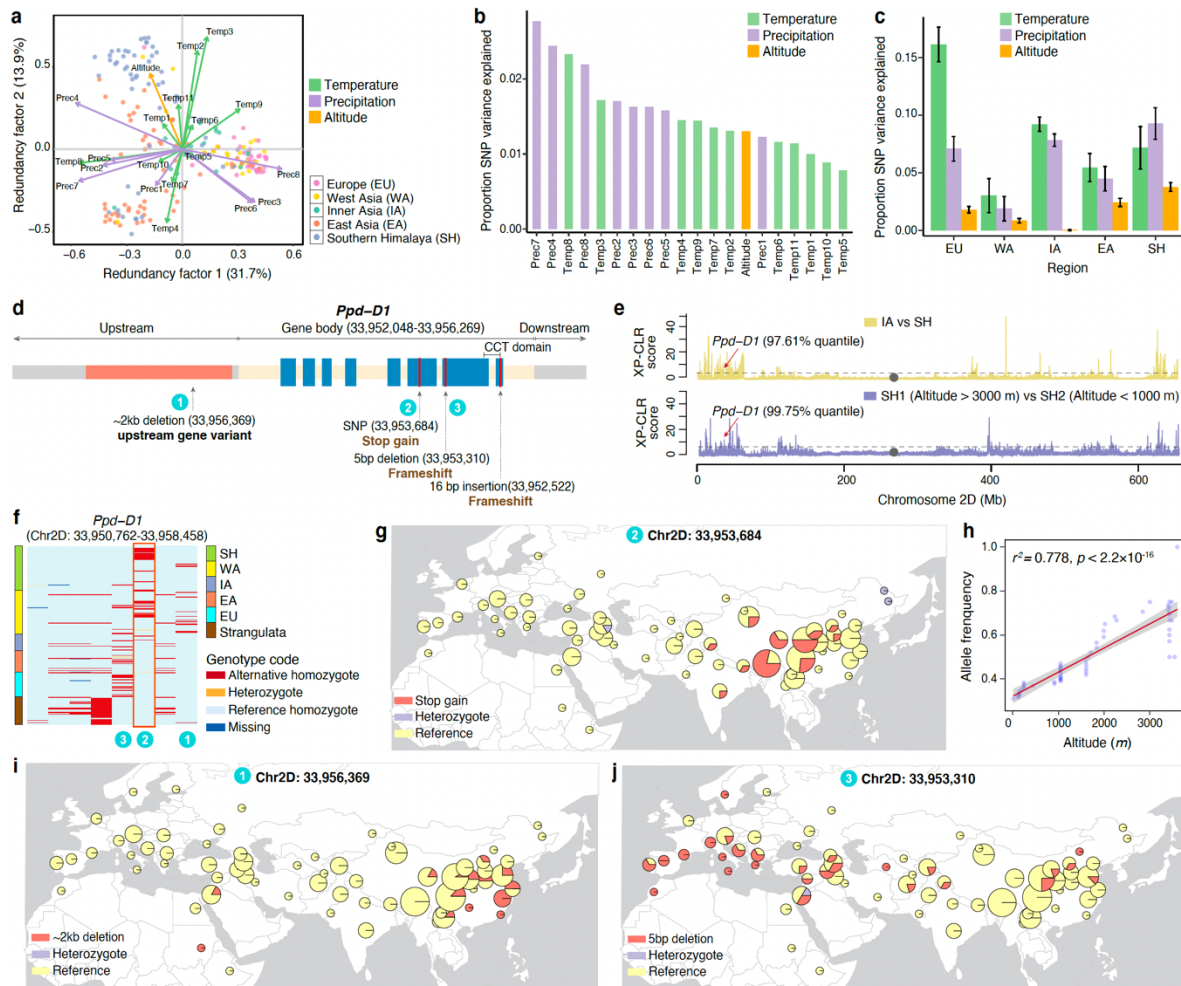

986

987 **Fig. 4 | Geographic expansion reshaped the adaptive genetic diversity of bread wheat.**

988 **a**, Landraces mapped on the first two canonical axes of Redundancy analysis (RDA). Arrows  
 989 represent 20 environmental factors (11 temperature factors, 8 precipitation factors, and  
 990 altitude) that are correlated with genotype of landraces. Colored points representing  
 991 accessions from different regions: Europe (EU), West Asia (WA), Inner Asia (IA), East Asia  
 992 (EA), and South Himalayas (SH). **b**, Ranked importance of environmental factors based on  
 993 individual RDA analyses. **c**, Proportion of total SNP variance explained in RDA by  
 994 environmental variable categories in each region. **d**, Sequence *Ppd-D1* gene on the  
 995 chromosome 2D of the reference genome (Chinese Spring). Three causative loss-of-function  
 996 alleles and non-causative frameshift mutation are marked with red rectangles. The light-  
 997 yellow rectangle represents the gene body. Blue rectangles represent exons. **e**, Selective

998 sweeps on chromosome 2D to identify adaptive footprints on *Ppd-D1*. Top: IA vs. SH.  
999 Bottom: SH1 (Altitude > 3000 m) vs. SH2 (Altitude < 1000 m). The horizontal dotted lines  
1000 indicate the top 5% genome-wide cut-off level. Arrows marked the position and top quantile  
1001 of the *Ppd-D1* gene. **f**, Haplotypes of *Ppd-D1* gene in strangulata and bread wheat landrace.  
1002 The numbers represent three loss-of-function genetic variants corresponding to **d**. The  
1003 colored bars on the left represent different species/populations. **g**, Geographic distribution  
1004 of the stop-gain mutation (number 2) of *Ppd-D1* gene. **h**, Correlation between frequency and  
1005 altitude of stop-gain mutation (number 2) of *Ppd-D1* gene. **i**, Geographic distribution of ~2kb  
1006 deletion (number 1) of *Ppd-D1* gene. **j**, Geographic distribution of 5-bp deletion (number 3)  
1007 of *Ppd-D1* gene. Orange indicates the proportion of three loss-of-function haplotypes in **g**, **i**  
1008 and **j**, respectively. Geographic maps in **g**, **i** and **j** were created using the R package  
1009 rworldmap.

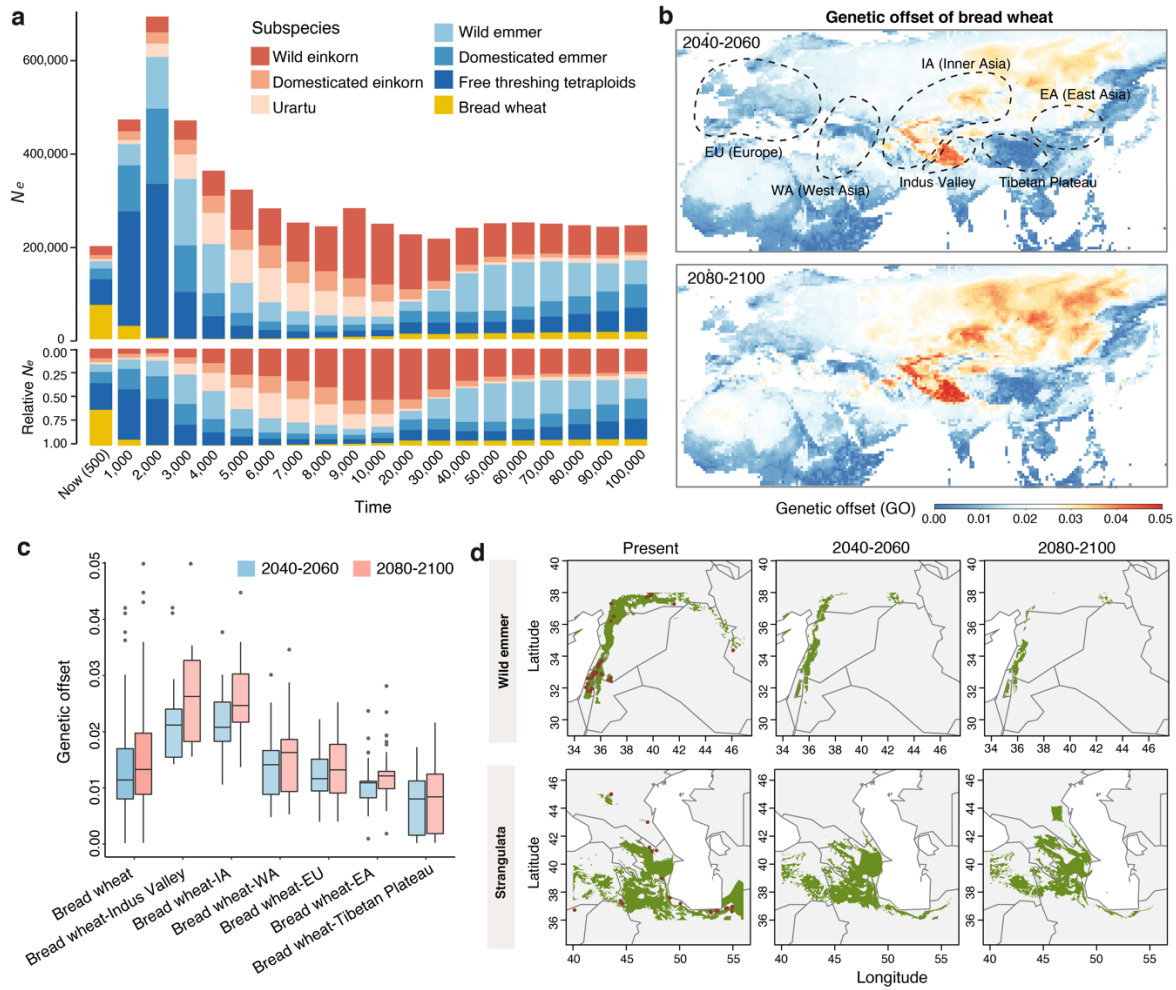

1010

1011 **Fig. 5 | The population size fluctuation of wheats from the past to the future. a,** Holocene

1012 population dynamics in wheats. The top of this figure depicts the  $N_e$  for seven populations,

1013 and the bottom of this figure is the relative  $N_e$  proportion of each population. **b,** Genetic

1014 offset (GO) of bread wheat landrace based on 2040-2060 RCP8.5 and 2080-2100 RCP8.5

1015 projections. **c,** Genetic offset of bread wheat landrace in six geographical regions,

1016 corresponding to **b**. The median and quartiles with whiskers reaching up to 1.5 times the

1017 interquartile range are shown in boxplots. **d,** Species distribution models (SDMs) projected

1018 the geographical range of wild emmer and strangulata populations in the present and future

1019 (2040-2060 and 2080-2100). Red dots pointed to the location of the samples in VMap1.1 and

1020 the USDA website (<https://npgsweb.ars-grin.gov/gringlobal/search>). The green shaded areas

1021 are suitable predicted regions for planting.
